# Supplementary material for: Tropical troposphere to stratosphere transport of carbon monoxide and long-lived trace species in the Chemical Lagrangian Model of the Stratosphere (CLaMS)
Source: Copernicus journal article supplement (doi:10.5194/gmd-7-2895-2014), 2014-12-08
Supplement: Supplementary file 2 [file gmd-7-2895-2014-supplement.zip]

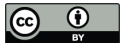

## *Supplement of*

# **Tropical troposphere to stratosphere transport of carbon monoxide and long-lived trace species in the Chemical Lagrangian Model of the Stratosphere (CLaMS)**

**R. Pommrich et al.**

*Correspondence to:* R. Müller (ro.mueller@fz-juelich.de)

- [gmd-7-2895-2014-supplement-cover-letter.pdf](#)
- [gmd-2014-0138-supplement.pdf](#)
- [radical\\_species\\_climatology.nc](#)
